# Supplementary figures and images for: Bioelectrical Impedance Analysis Can Be an Effective Tool for Screening Fatty Liver in Patients with Suspected Liver Disease
Source: MDPI journal article supplement (doi:10.3390/healthcare10112268), 2022-11-11

**Supplementary Figure S1.** Factors associated with CAP score (multivariate analysis)

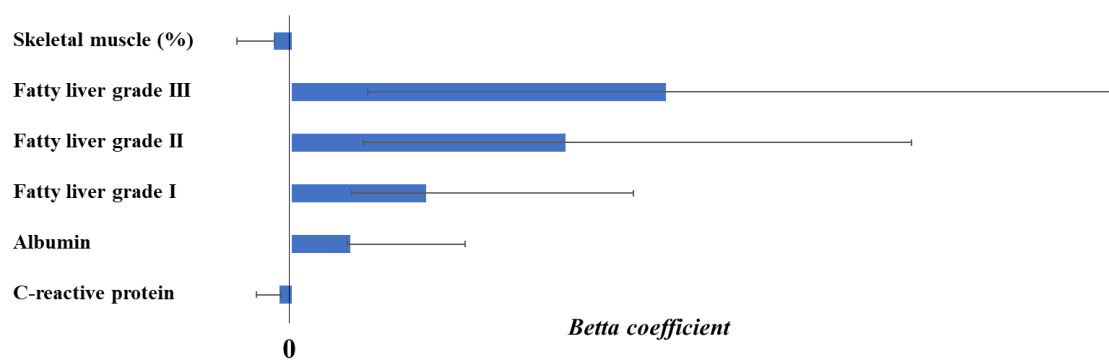

Supplement: s1 [file s1]
